# Supplementary material for: Self-assembly of highly luminescent lanthanide complexes promoted by pyridine-tetrazolate ligands
Source: Royal Society of Chemistry journal article supplement (doi:10.1039/c1dt11627d), 2011-11-30

## SUPPORTING INFORMATION

### **Self-assembly of highly luminescent lanthanide complexes promoted by pyridine-tetrazolate ligands**

**Eugen S. Andreiadis,<sup>a</sup> Daniel Imbert,<sup>a</sup> Jacques Pécaut,<sup>a</sup> Renaud Demadrille<sup>b</sup> and Marinella Mazzanti<sup>\*a</sup>**

<sup>a</sup> CEA-Grenoble, INAC, SCIB, Laboratoire de Reconnaissance Ionique et Chimie de Coordination, UMR-E 3 CEA-UJF, 38054 Grenoble Cedex 9, France.

E-mail: [marinella.mazzanti@cea.fr](mailto:marinella.mazzanti@cea.fr)

<sup>b</sup> CEA Grenoble, INAC, SPrAM, Laboratoire d'Electronique Moléculaire, Organique et Hybride UMR 5819 CEA-CNRS-UJF, 38054 Grenoble, France

**Figure S1.** ORTEP diagram of the coordination sphere in the  $[\text{Eu}(\text{pytz})_3](\text{NH}_4\text{Et}_3)_3$  complex: view along the  $c$  axis, with thermal ellipsoids at the 50% probability level (hydrogen atoms were omitted for clarity). Symmetry transformation used to generate equivalent atoms noted by «'»  $2-x, y, 1.5-z$ .

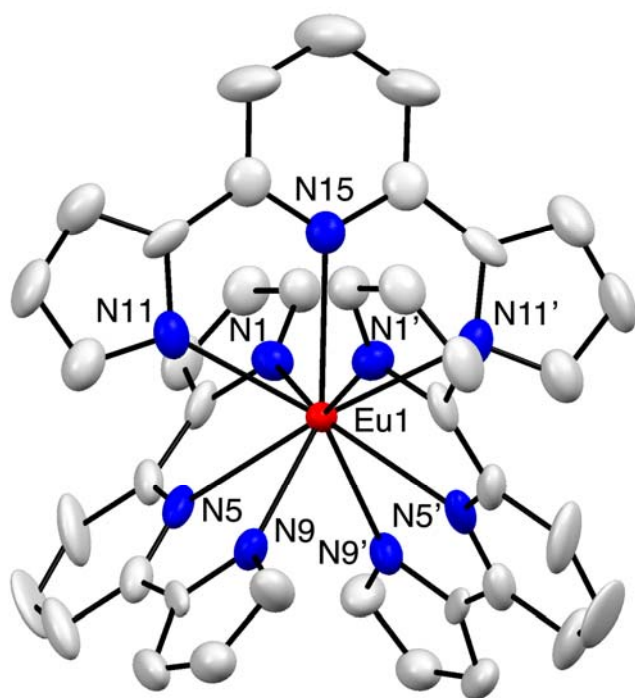

**Figure S2.**  $^1\text{H}$  NMR spectra of the  $[\text{Eu}(\text{pytz})_3](\text{NH}_4\text{Et}_3)_3$  complex in water solutions at 298K.

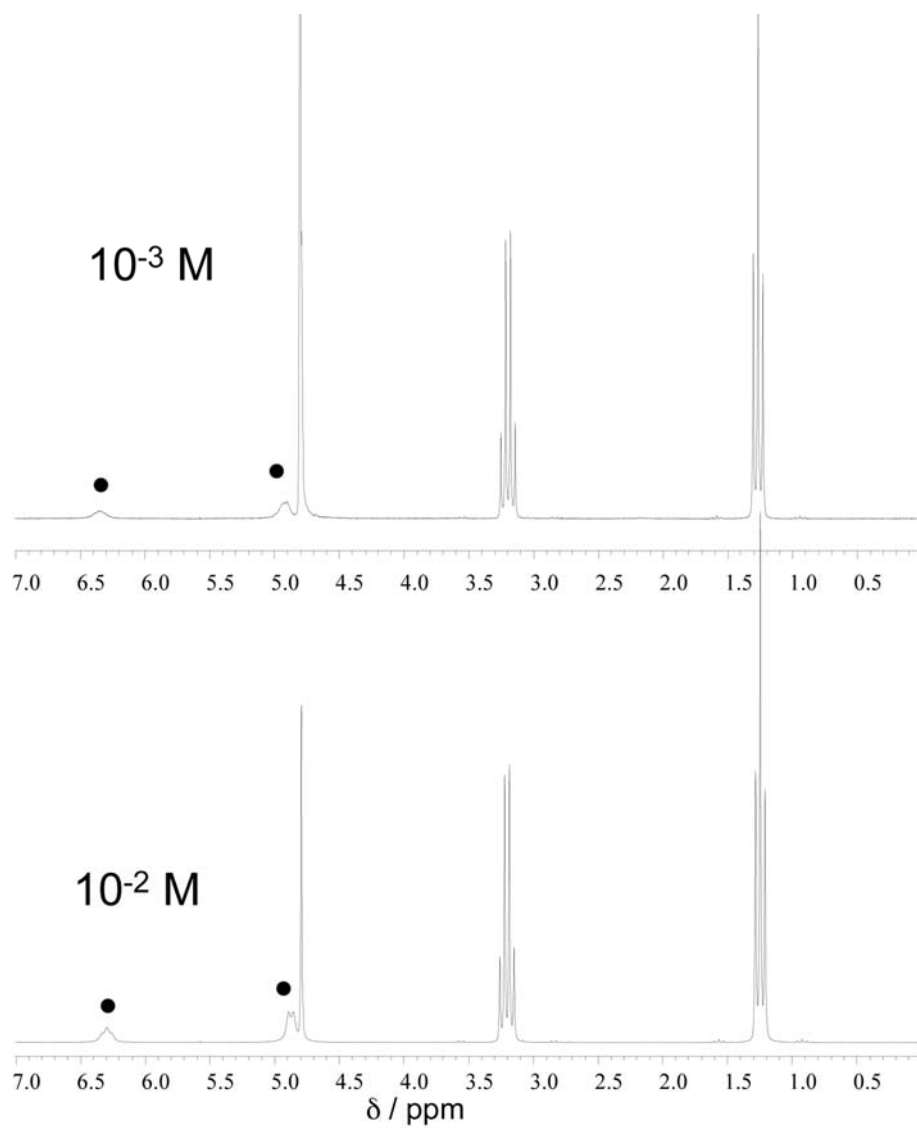

**Figure S3.** Normalized excitation and emission spectra of the **pytzc**<sup>2-</sup> ligand and its [Ln(**pytzc**)<sub>3</sub>]<sup>3-</sup> complexes (Ln=Gd and Eu)<sup>a</sup>

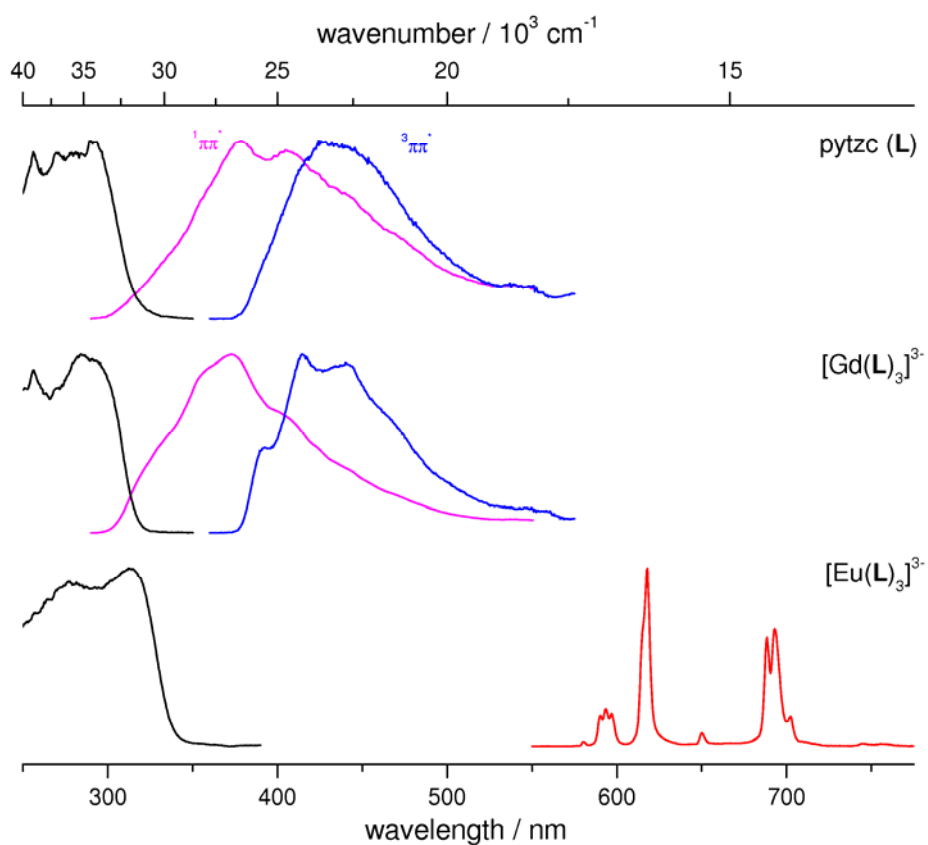

<sup>a</sup> Singlet and triplet state levels are measured in methanol solutions at 298K and 77K, respectively, upon excitation at  $35\,700 \text{ cm}^{-1}$ . Eu and Tb luminescence spectra are recorded in solid state at 298K. Excitation spectra are measured at the maximum of emission.

**Figure S4.** Linear relationships between the singlet (blue) and triplet (red) energy levels and the Hammet resonance parameters for the dianionic pyridine ligands **pytz**, **pytzc** and **dpa**.

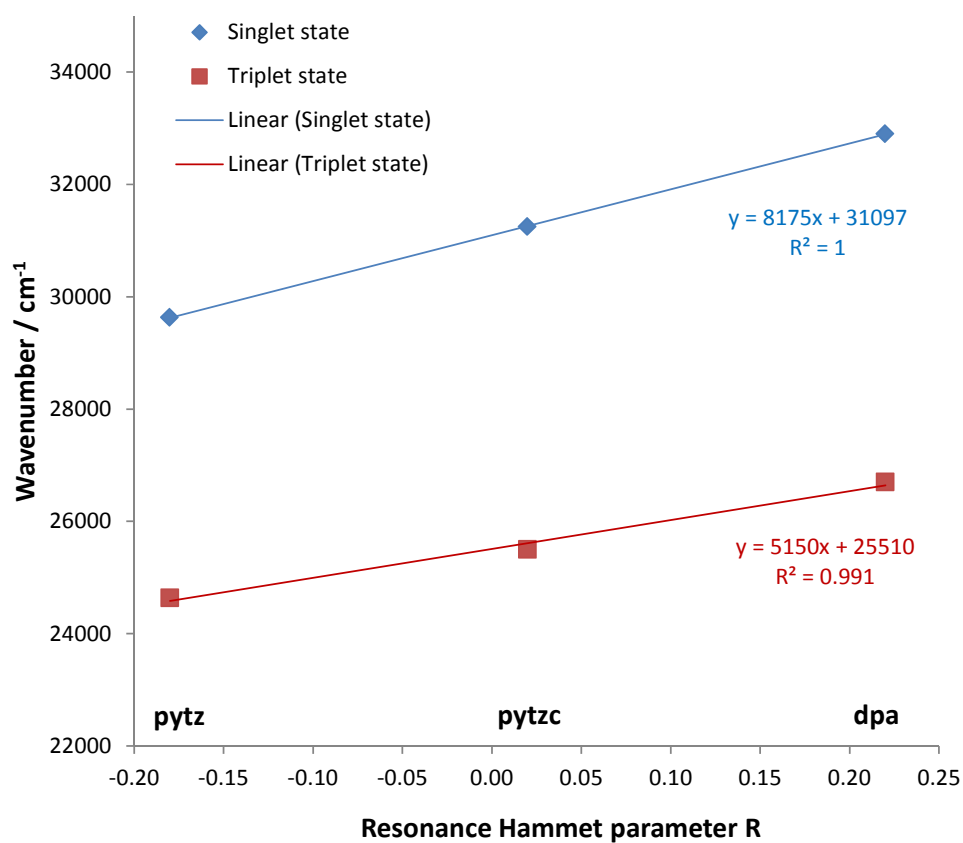

**Figure S5.** Excitation and Emission spectra of the Europium ( $\lambda_{an} = 616$  nm) and Terbium ( $\lambda_{an} = 545$  nm) complexes in water ( $10^{-3}$  M) and in solid state. Excitation at 321 and 350 nm in water and in solid state, respectively.

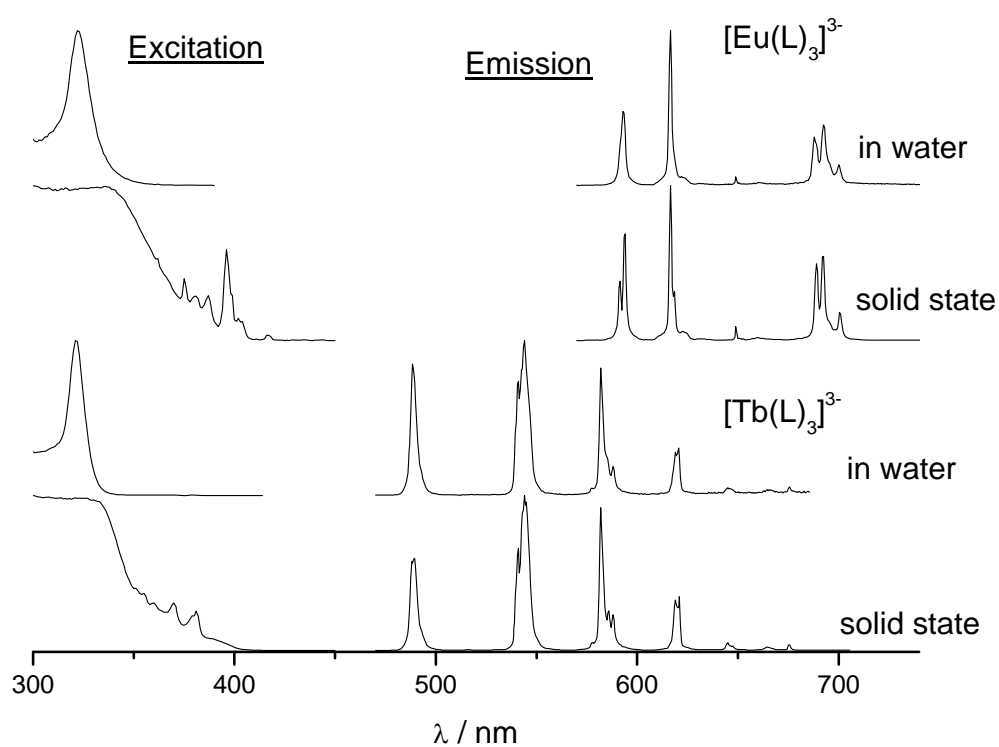

Supplement: c1dt11627d.pdf [file c1dt11627d.pdf]
